# Supplementary material for: Maternal Protein Restriction Altered Insulin Resistance and Inflammation-Associated Gene Expression in Adipose Tissue of Young Adult Mouse Offspring in Response to a High-Fat Diet
Source: PubMed Central journal article supplement (PMC7230574; doi:10.3390/nu12041103), 2020-04-16
Supplement: nutrients-12-01103-s001.pdf [file nutrients-12-01103-s001.pdf]

Supplementary Materials

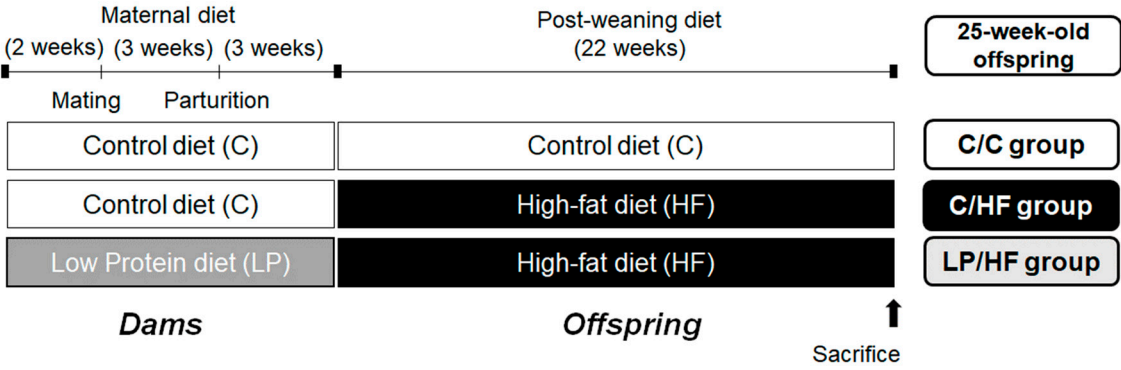

Figure S1. Overview of experimental design.

**Table S1.** Composition of experimental diet of dams.

| <b>Ingredient (kcal/g)</b>       | <b>Control (C)</b> | <b>Low Protein (LP)</b> |
|----------------------------------|--------------------|-------------------------|
| Casein <sup>1</sup>              | 200.0              | 100.0                   |
| L-Cystine                        | 3.0                | 1.5                     |
| Corn Starch                      | 397.5              | 499.0                   |
| Maltodextrin                     | 132.0              | 132.0                   |
| Sucrose                          | 100.0              | 100.0                   |
| Soybean Oil                      | 70.0               | 70.0                    |
| Cellulose                        | 50.0               | 50.0                    |
| Mineral Mix <sup>2</sup>         | 35.0               | 35.0                    |
| Dicalcium phosphate <sup>3</sup> | -                  | 4.4                     |
| Calcium carbonate <sup>3</sup>   | 2.5                | -                       |
| Vitamin Mix <sup>4</sup>         | 10.0               | 10.0                    |
| Choline Bitartrate               | 2.5                | 2.5                     |
| tert-Butylhydroquinone           | 0.014              | 0.014                   |
| Total                            | 1002.5             | 1004.4                  |

<sup>1</sup> CA160030 (Harlan, USA). <sup>2</sup>AIN-93G-MX (TD94046: Harlan, USA). <sup>3</sup>Additional amounts were added to satisfy the mouse requirement of minerals and Ca: P ratio in both groups. <sup>4</sup>AIN-93G-VX (TD94047: Harlan, USA).

**Table S2.** List of DEGs of enriched GO BP terms between LP/HF and C/HF groups.

| <b>GO biological process</b>                                                           | <b>FDR</b> | <b>DEG</b>                                                                                                                                                                                                                                                                      |
|----------------------------------------------------------------------------------------|------------|---------------------------------------------------------------------------------------------------------------------------------------------------------------------------------------------------------------------------------------------------------------------------------|
| <b>Up-regulated</b>                                                                    |            |                                                                                                                                                                                                                                                                                 |
| Fatty acid catabolic process (GO:0009062)                                              | 1.97E-02   | <i>Abcd2, Acat1, Adipoq, Gcdh, Hacl1, Pck1, Phyh</i>                                                                                                                                                                                                                            |
| Fatty acid oxidation (GO:0019395)                                                      | 2.26E-02   | <i>Abcd2, Acat1, Adipoq, Adipor2, Gcdh, Hacl1, Phyh</i>                                                                                                                                                                                                                         |
| <b>Down-regulated</b>                                                                  |            |                                                                                                                                                                                                                                                                                 |
| Positive regulation of cytokine production (GO:0001819)                                | 1.38E-03   | <i>Adora2b, Casp1, Clec4n, Creb1, Cyp1b1, Epo, Fcgr3, Fzd5, Gpsm3, Havcr2, Il1rl2, Il27ra, Naip5, Osm, Pf4, Rasgrp1, Ticam2</i>                                                                                                                                                 |
| Negative regulation of cell population proliferation (GO:0008285)                      | 2.41E-03   | <i>Adora2b, Cd80, Cd9, Cyp1b1, Fam129b, Fzd5, Gas1, Havcr2, Kctd11, Lmna, Ptgir, Rassf5, Serpine2, Slfn1, Srf, Tes, Tgfb2, Tnfrsf21, Trim35, Trpv2, Vsig4</i>                                                                                                                   |
| Adenylate cyclase-modulating G protein-coupled receptor signaling pathway (GO:0007188) | 2.86E-03   | <i>Adgrg6, Adora2b, Adra1a, Adra1a, Fpr2, Gna15, Htr1a, Npy2r, P2ry12, Pf4, Ptgir</i>                                                                                                                                                                                           |
| Cell surface receptor signaling pathway (GO:0007166)                                   | 4.07E-03   | <i>Adgrg6, Adora2b, Angpt2, Anxa4, Atp1a3, Bcl2a1c, Bcl2a1d, Ccl8, Cd80, Clec4d, Creb1, Csf1, Egfr, Epo, Ermap, Fcgr3, Fpr2, Fzd5, Hhex, Hs1bp3, Ifngr2, Irak3, Itgam, Osm, P2ry12, Pf4, Plaur, Plek, Rassf2, Rcan2, Ror1, Sh3bp1, Shc2, Shisa6, Tgfb2, Tnfrsf12a, Tnfrsf21</i> |
| Positive regulation of response to external stimulus (GO:0032103)                      | 5.18E-03   | <i>Adora2b, Alox5ap, Colec12, Csf1, Egfr, Fcgr3, Fpr2, Gpsm3, Havcr2, Irak3, Klr1c, Lgmn, Osm, P2ry12, Rasgrp1, Ticam2</i>                                                                                                                                                      |
| Positive regulation of defense response (GO:0031349)                                   | 7.61E-03   | <i>Adora2b, Alox5ap, Colec12, Egfr, Fcgr3, Fpr2, Gpsm3, Havcr2, Irak3, Klr1c, Osm, Rasgrp1, Ticam2</i>                                                                                                                                                                          |
| Second-messenger-mediated signaling (GO:0019932)                                       | 1.17E-02   | <i>Adgrg6, Adora2b, Adra1a, Adra1a, Camkk2, Fpr2, Npy2r, P2ry12, Pf4, Ptgir, Rcan1, Rcan2</i>                                                                                                                                                                                   |
| Regulation of apoptotic process (GO:0042981)                                           | 1.46E-02   | <i>Arl6ip5, Bcl2a1d, Bin1, Casp1, Cd248, Creb1, Cyp1b1, Egfr, Epo, Fam129b, Fpr2, Gas1, Hs1bp3, Il1rn, Irak3, Itgam, Lgmn, Lmna, Mical1, Naip2, Naip5, Ncf2, Osm, Pf4, Plac8, Plaur, Rassf2, Rassf5, Timp1, Tnfrsf12a, Trim35</i>                                               |
| Angiogenesis (GO:0001525)                                                              | 1.58E-02   | <i>Angpt2, Arhgap22, Bmper, Cfln, Cyp1b1, Epo, Fzd5, Mmp19, Srf, Tgfb2, Tnfaip2, Tnfrsf12a</i>                                                                                                                                                                                  |
| Cell junction assembly (GO:0034329)                                                    | 1.73E-02   | <i>Cd9, Cdh10, Lamc1, Nfasc, Plec, Sh3bp1, Srf, Wdr1</i>                                                                                                                                                                                                                        |

**Table S3.** List of top 10 up-regulated and down-regulated DEGs between LP/HF and C/HF groups.

| <b>Gene symbol</b>    | <b>Name</b>                                                         | <b>Fold change</b> | <b>P-value</b> |
|-----------------------|---------------------------------------------------------------------|--------------------|----------------|
| <b>Up-regulated</b>   |                                                                     |                    |                |
| <i>S100b</i>          | S100 protein, beta polypeptide, neural                              | 17.81              | 0.019          |
| <i>Id1</i>            | Inhibitor of DNA binding 1                                          | 3.89               | 0.000          |
| <i>Retnla</i>         | Resistin like alpha                                                 | 3.66               | 0.005          |
| <i>Peg3</i>           | Paternally expressed 3                                              | 3.53               | 0.030          |
| <i>Pck1</i>           | Phosphoenolpyruvate carboxykinase 1, cytosolic                      | 3.51               | 0.003          |
| <i>Gfra2</i>          | Glial cell line derived neurotrophic factor family receptor alpha 2 | 3.45               | 0.031          |
| <i>Zim1</i>           | Zinc finger, imprinted 1                                            | 3.43               | 0.000          |
| <i>Pfkfb3</i>         | 6-phosphofructo-2-kinase/fructose-2,6-biphosphatase 3               | 3.39               | 0.012          |
| <i>Olfir1372-ps1</i>  | Olfactory receptor 1372, pseudogene 1                               | 3.26               | 0.007          |
| <i>Nrg4</i>           | Neuregulin 4                                                        | 3.10               | 0.045          |
| <b>Down-regulated</b> |                                                                     |                    |                |
| <i>Clec4d</i>         | C-type lectin domain family 4, member d                             | -10.45             | 0.008          |
| <i>Timp1</i>          | Tissue inhibitor of metalloproteinase 1                             | -8.47              | 0.002          |
| <i>Mup12</i>          | Major urinary protein 12                                            | -7.53              | 0.049          |
| <i>Mup2</i>           | Major urinary protein 2                                             | -7.20              | 0.049          |
| <i>Mup13</i>          | Major urinary protein 13                                            | -6.34              | 0.015          |
| <i>Mup7</i>           | Major urinary protein 7                                             | -5.23              | 0.049          |
| <i>Mup8</i>           | Major urinary protein 8                                             | -4.84              | 0.025          |
| <i>Ncf2</i>           | Neutrophil cytosolic factor 2                                       | -4.66              | 0.040          |
| <i>Msr1</i>           | Macrophage scavenger receptor 1                                     | -4.52              | 0.018          |
| <i>Plac8</i>          | Placenta-specific 8                                                 | -3.92              | 0.002          |

DEGs are listed in descending order of |fold change|.

**Table S4.** List of DEGs of enriched GO BP terms between LP/HF and C/C groups.

| GO biological process                                                | FDR      | DEG                                                                                                                                                                                                                                                                                                                                                                                                                                                                         |
|----------------------------------------------------------------------|----------|-----------------------------------------------------------------------------------------------------------------------------------------------------------------------------------------------------------------------------------------------------------------------------------------------------------------------------------------------------------------------------------------------------------------------------------------------------------------------------|
| <b>Down-regulated</b>                                                |          |                                                                                                                                                                                                                                                                                                                                                                                                                                                                             |
| Blood coagulation<br>(GO:0007596)                                    | 4.54E-03 | <i>Anxa8, Cfh, F13a1, P2ry12, Pdgfra, Pf4, Procr, Serpine2, Srf</i>                                                                                                                                                                                                                                                                                                                                                                                                         |
| Defense response<br>(GO:0006952)                                     | 2.35E-02 | <i>Ackr2, Ahsg, Ang, C1qc, C1ra, C8a, Ccl12, Ccl8, Cfh, Clec4n, Ecm1, Egfr, Fcna, Ifit1bl2, Il1rn, Lyz2, Mrc1, Nfkb2, Pf4, Pik3cd, Pik3cg, Ppp1r14b, Rab43, Rps19, Timp1, Tnfaip8, Trim30a, Trim59, Tslp, Vamp8</i>                                                                                                                                                                                                                                                         |
| Immune system<br>process (GO:0002376)                                | 4.19E-02 | <i>Ackr2, Ang, C1qc, C1ra, C8a, Ccl12, Ccl8, Cd248, Cfh, Clec1b, Clec4n, Colec12, Ctsh, Ermap, Fcna, Flt3, Fzd7, H2-M2, Hfe, Hhex, Ifi204, Ifit1bl2, Il1rn, Kcnn4, Mfap5, Mrc1, Nfkb2, Pdgfra, Pf4, Pik3cd, Pik3cg, Ppp1r14b, Rab43, Rps19, Sgpl1, Srf, Tnfrsf17, Trim30a, Trim59, Tslp, Vamp8, Zfp385a</i>                                                                                                                                                                 |
| Positive regulation of<br>protein<br>phosphorylation<br>(GO:0001934) | 4.33E-02 | <i>Ang, Ccl12, Ccl8, Dlg3, Egfr, Fam129a, Fgfr1, Flt3, Grem1, Hfe, Htr2b, Iapp, Il1rn, Inhbb, Lrrn3, Madd, Map3k13, Nmb, Osbpl8, Pdgfra, Pik3cg, S1pr2, Shc2, Tslp</i>                                                                                                                                                                                                                                                                                                      |
| Negative regulation of<br>cellular process<br>(GO:0048523)           | 4.93E-02 | <i>Ahsg, Ang, Anxa4, Anxa8, Arap1, Astl, C1qc, Ccl12, Creb1, Ctsh, Dlg3, Dnm1, Dok1, Dpep1, Draxin, Dusp7, Ecm1, Egfr, Fam129a, Fam129b, Fgfr1, Flt3, Fntb, Fzd7, Gas1, Grem1, Hes6, Hfe, Hhex, Hist2h2ab, Htr1b, Htr2b, Iapp, Il1rn, Inhbb, Jun, Madd, Maf, Mlx, Nbl1, Nfkb2, Nmb, Nme1, Osbpl8, P2ry12, Pdgfra, Pf4, Pik3cg, Pla1a, Plat, Rassf5, Rgs10, S1pr2, Sap30, Serpine2, Sp2, Srf, Suo39h2, Tigit, Timp1, Trim30a, Trim59, Tslp, Vamp8, Vsig4, Xrcc2, Zfp385a</i> |

**Table S5.** List of top 10 up-regulated and down-regulated DEGs between LP/HF and C/C groups.

| <b>Gene symbol</b>    | <b>Name</b>                                                               | <b>Fold change</b> | <b>P-value</b> |
|-----------------------|---------------------------------------------------------------------------|--------------------|----------------|
| <b>Up-regulated</b>   |                                                                           |                    |                |
| <i>Gm11096</i>        | Predicted gene 11096                                                      | 36.47              | 0.025          |
| <i>Zfp600</i>         | Zinc finger protein 600                                                   | 5.74               | 0.040          |
| <i>Fhit</i>           | Fragile histidine triad gene                                              | 3.26               | 0.035          |
| <i>Sfrp5</i>          | Secreted frizzled-related sequence protein 5                              | 3.00               | 0.026          |
| <i>Rex2</i>           | Reduced expression 2                                                      | 2.80               | 0.050          |
| <i>Scgn</i>           | Secretagoin, EF-hand calcium binding protein                              | 2.78               | 0.006          |
| <i>Pck1</i>           | Phosphoenolpyruvate carboxykinase 1, cytosolic                            | 2.71               | 0.024          |
| <i>Gm11116</i>        | Predicted gene 11116                                                      | 2.65               | 0.010          |
| <i>Tmem182</i>        | Transmembrane protein 182                                                 | 2.59               | 0.009          |
| <i>Pfkfb3</i>         | 6-phosphofructo-2-kinase/fructose-2,6-biphosphatase 3                     | 2.50               | 0.015          |
| <b>Down-regulated</b> |                                                                           |                    |                |
| <i>Gnal</i>           | Guanine nucleotide binding protein, alpha stimulating, olfactory type     | -8.32              | 0.035          |
| <i>Ccl8</i>           | Chemokine (C-C motif) ligand 8                                            | -7.99              | 0.018          |
| <i>Hvcn1</i>          | Hydrogen voltage-gated channel 1                                          | -6.29              | 0.010          |
| <i>Wfdc17</i>         | WAP four-disulfide core domain 17                                         | -4.38              | 0.012          |
| <i>Lgi2</i>           | Leucine-rich repeat LGI family, member 2                                  | -3.74              | 0.048          |
| <i>Atp1a3</i>         | ATPase, Na <sup>+</sup> /K <sup>+</sup> transporting, alpha 3 polypeptide | -3.72              | 0.033          |
| <i>Msr1</i>           | Macrophage scavenger receptor 1                                           | -3.71              | 0.032          |
| <i>Vsig4</i>          | V-set and immunoglobulin domain containing 4                              | -3.57              | 0.031          |
| <i>Timp1</i>          | Tissue inhibitor of metalloproteinase 1                                   | -3.45              | 0.037          |
| <i>Ccl12</i>          | Chemokine (C-C motif) ligand 12                                           | -3.33              | 0.044          |

DEGs are listed in descending order of |fold change|.
